# Supplementary material for: Electrochemical Biosensor Using Nitrogen-Doped Graphene/Au Nanoparticles/DNAzyme for Ca2+ Determination
Source: MDPI journal article supplement (doi:10.3390/bios12050331), 2022-05-12
Supplement: s1 [file s1]

# Electrochemical Biosensor using Nitrogen-doped graphene/Au nanoparticles/DNAzyme for $\text{Ca}^{2+}$ Determination

Zhixue Yu <sup>1</sup>, Hui Wang <sup>1</sup>, Yiguang Zhao <sup>1</sup>, Fan Zhang <sup>1,2</sup>, Xiangfang Tang <sup>1</sup> and Benhai Xiong <sup>1,\*</sup>

<sup>1</sup> State Key Laboratory of Animal Nutrition, Institute of Animal Sciences, Chinese Academy of Agricultural Sciences, Beijing 100193, China; 82101205310@caas.cn (Z.Y.); wanghui10@caas.cn (H.W.); zhaoyiguang@caas.cn (Y.Z.); 82101199124@caas.cn (F.Z.); tangxiangfang@caas.cn (X.T.)

<sup>2</sup> College of Animal Science and Technology, China Agricultural University, Beijing 100193, China

\* Correspondence: xiongbenhai@caas.cn (B.X.); Tel.: +86-010-62811680(B.X.)

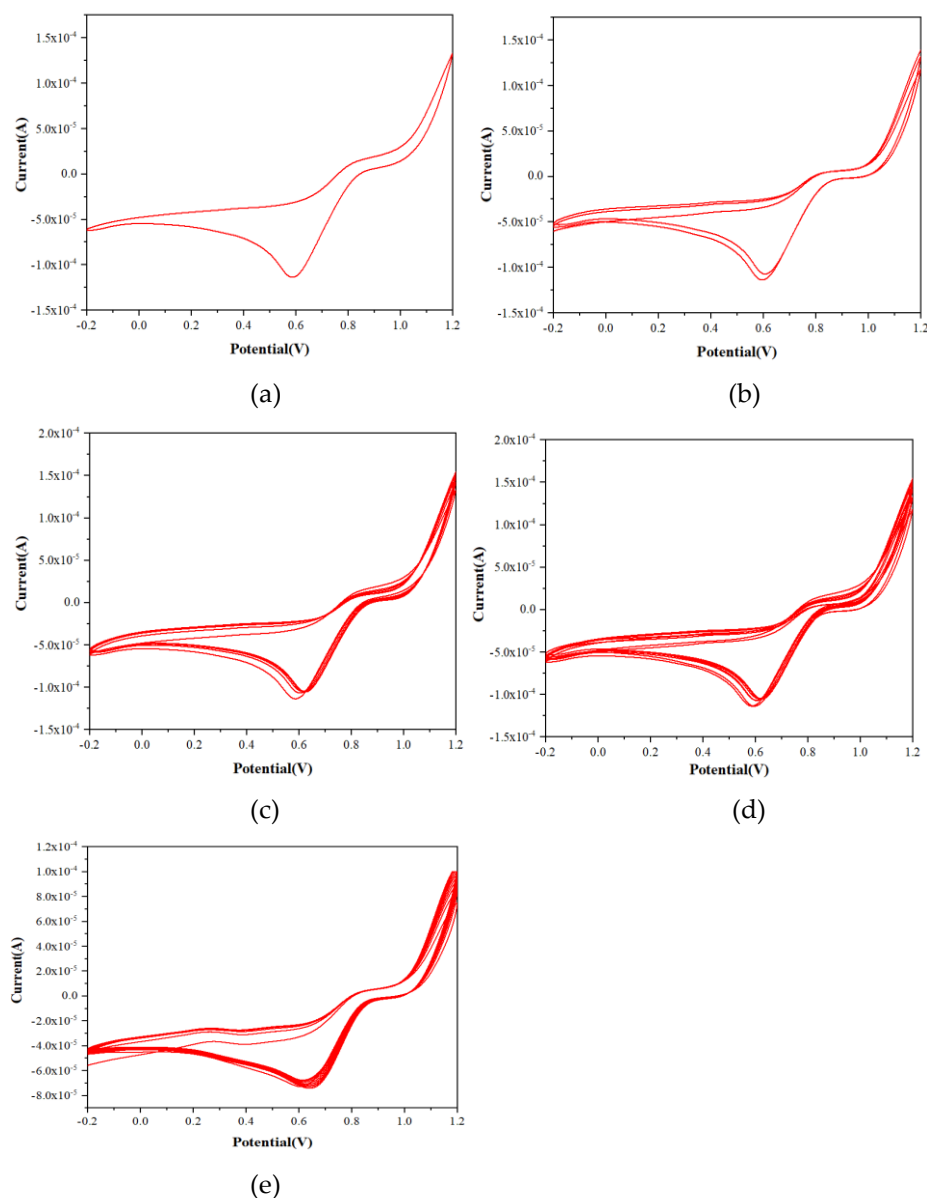

**Figure S1.** The images of AuNPs deposited 2 r (a), 5 r (b), 10 r (c), 15 r (d), and 20 r (e).

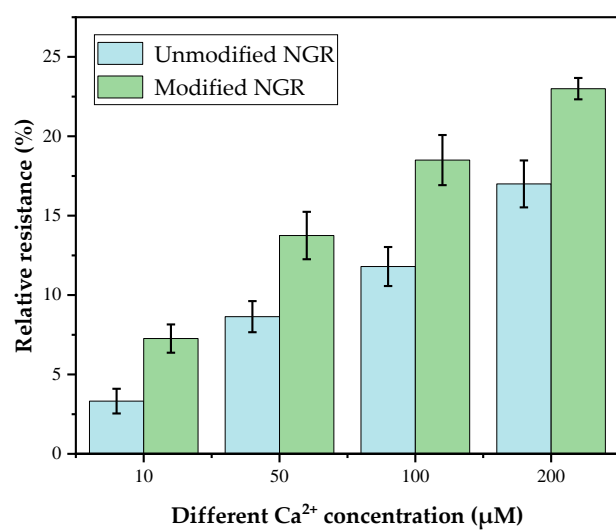

**Figure S2.** Comparison of the relative resistances of  $\text{Ca}^{2+}$  at different concentrations with and without NGR modification.
